---

Corrigendum

## **relax: the analysis of biomolecular kinetics and thermodynamics using NMR relaxation dispersion data**

**Sébastien Morin, Troels E. Linnet, Mathilde Lescanne, Paul Schanda, Gary S. Thompson, Martin Tollinger, Kaare Teilum, Stéphane Gagné, Dominique Marion, Christian Griesinger, Martin Blackledge and Edward J. d’Auvergne**

---

*Bioinformatics*, (2014) doi: 10.1093/bioinformatics/btu166

In the above article funding information was initially omitted.  
The following funding statement has been added to the article online:

This work was supported by the European Research Council  
(ERC-StG-2012-311318-ProtDyn2Function)

The author apologises for this error.
